# Supplementary material for: Enhancer decommissioning by MLL4 ablation elicits dsRNA-interferon signaling and GSDMD-mediated pyroptosis to potentiate anti-tumor immunity
Source: Springer Nature journal article supplement (doi:10.1038/s41467-022-34253-1), 2022-11-02
Supplement: 41467_2022_34253_MOESM3_ESM.pdf [file 41467_2022_34253_MOESM3_ESM.pdf]

File Name: Supplementary Data 1

Description: Information on the DNA oligo sequence, constructs, antibodies, cell lines, software, mouse strains and other reagents.
